# Supplementary material for: A Simple and Label-Free Detection of As3+ using 3-nitro-L-tyrosine as an As3+-chelating Ligand
Source: MDPI journal article supplement (doi:10.3390/s19132857), 2019-06-27
Supplement: s1 [file s1]

## Supporting Information

### **A Simple and Label-free Detection of As<sup>3+</sup> using 3-nitro-L-tyrosine as a As<sup>3+</sup>-chelating ligand**

**Jin-Ho Park<sup>1,2</sup>, Gyuhoo Yeom<sup>1</sup>, Donggu Hong<sup>1</sup>, Eun-Jung Jo<sup>1</sup>, Chin-Ju Park<sup>1</sup> and Min-Gon Kim<sup>1,\*</sup>**

<sup>1</sup>Department of Chemistry, Gwangju Institute of Science and Technology (GIST), 123 Cheomdangwagi-ro, Buk-Gu, Gwangju 61005, Republic of Korea; jhp1223@gist.ac.kr (J.-H.P.); ygh0727@gist.ac.kr (G.Y.); inkohdg@gist.ac.kr (D.H.); jej@gist.ac.kr (E.-J.J.); cjpark@gist.ac.kr (C.-J.P.)

<sup>2</sup>Center for Systems Biology, Massachusetts General Hospital, Harvard Medical School, Boston, MA 02114, USA; jpark93@mgh.harvard.edu (J.-H.P.)

\*Correspondence: mkim@gist.ac.kr (M.-G.K.); Tel.: +82-62-3330; Fax: +82-62-2887

**Table S1.** Parameter values obtained via ITC measurement

| Model            | Parameter                 | Value    |
|------------------|---------------------------|----------|
| Blank (constant) | Blank ( $\mu\text{J}$ )   | 16.9669  |
|                  | $K_a$ ( $\text{M}^{-1}$ ) | 2.13E+05 |
|                  | $n$                       | 0.640    |
| Independent      | $\Delta H$ (kJ/mol)       | 5.787    |
|                  | $K_d$ (M)                 | 4.70E-06 |
|                  | $S$ (J/mol·K)             | 121.4    |

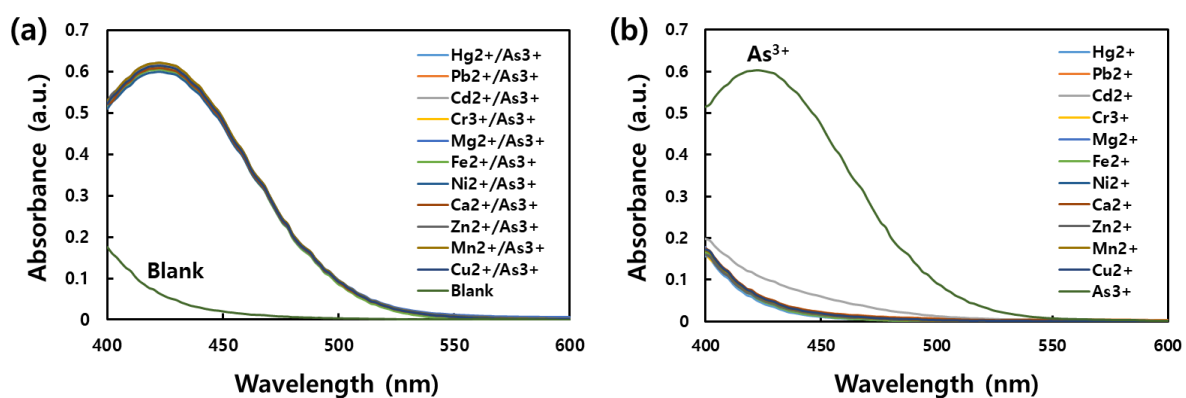

**Figure S1.** Absorption spectra of mixtures of metal ions and N-Tyr (a) with or (b) without As<sup>3+</sup>.

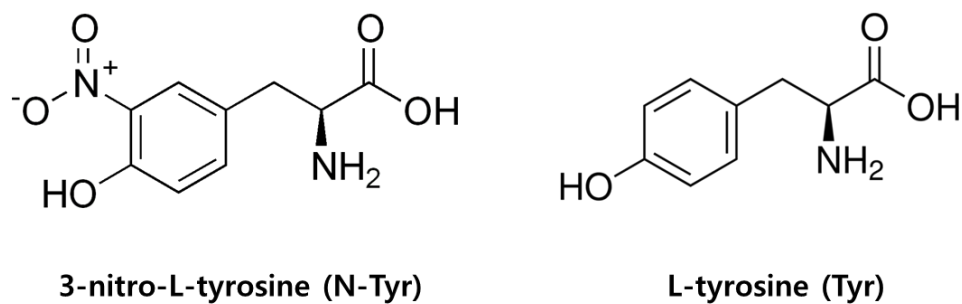

**Figure S2.** Chemical structure of N-Tyr and Tyr. A NO<sub>2</sub> group exists in chemical structure of N-Tyr.

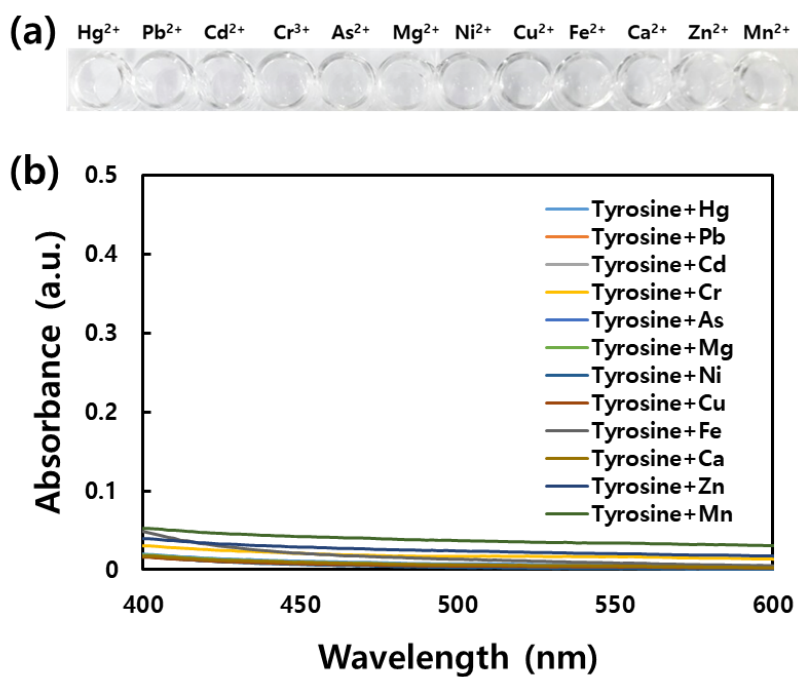

**Figure S3.** The reaction between various metal ions and Tyr. (a) Images of the mixtures and (b) the corresponding absorption spectra are shown.

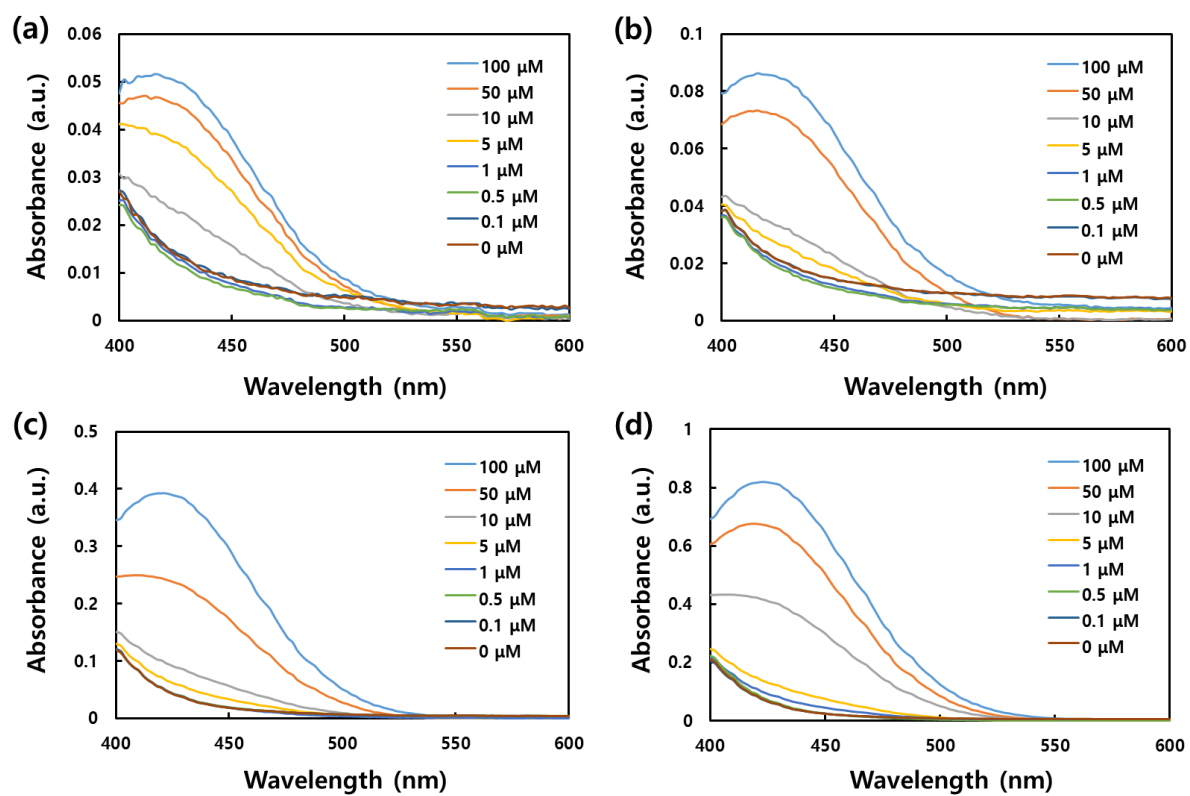

**Figure S4.** Absorption spectra depending on  $\text{As}^{3+}$  with different concentrations of N-Tyr, (a) 50  $\mu\text{M}$ , (b) 100  $\mu\text{M}$ , (c) 500  $\mu\text{M}$  and (d) 1,000  $\mu\text{M}$ .

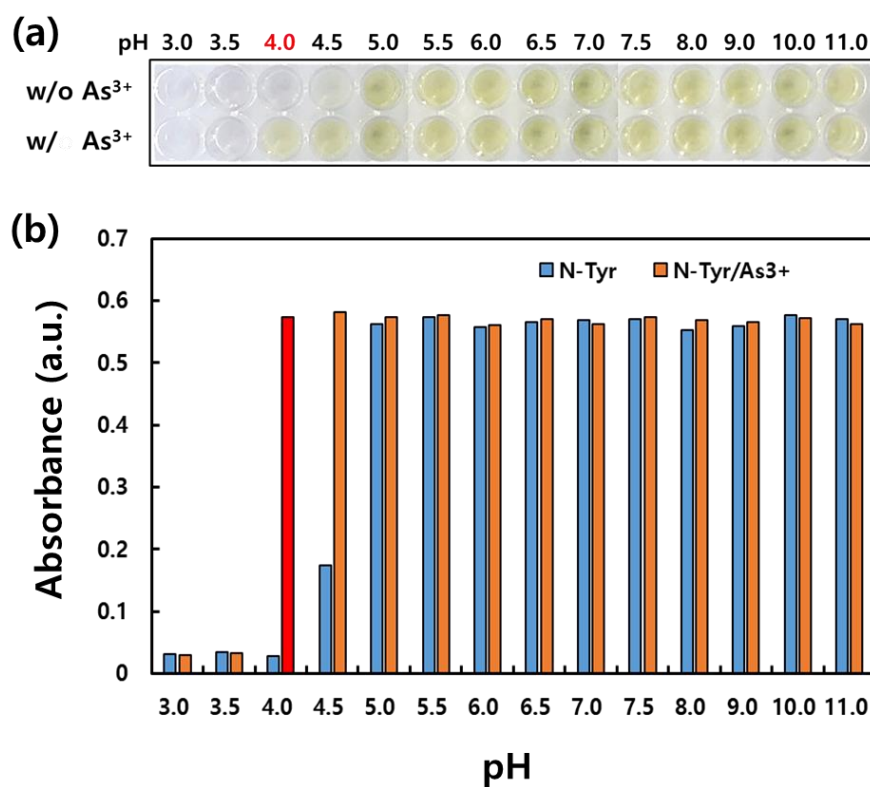

**Figure S5.** Various pHs were tested with two experimental conditions, N-Tyr alone and  $\text{As}^{3+}$ /N-Tyr mixture. A selective yellow color with  $\text{As}^{3+}$  was appeared under pH 4.0. In this test, 0.5 mM N-Tyr and 1 mM  $\text{As}^{3+}$  were used.

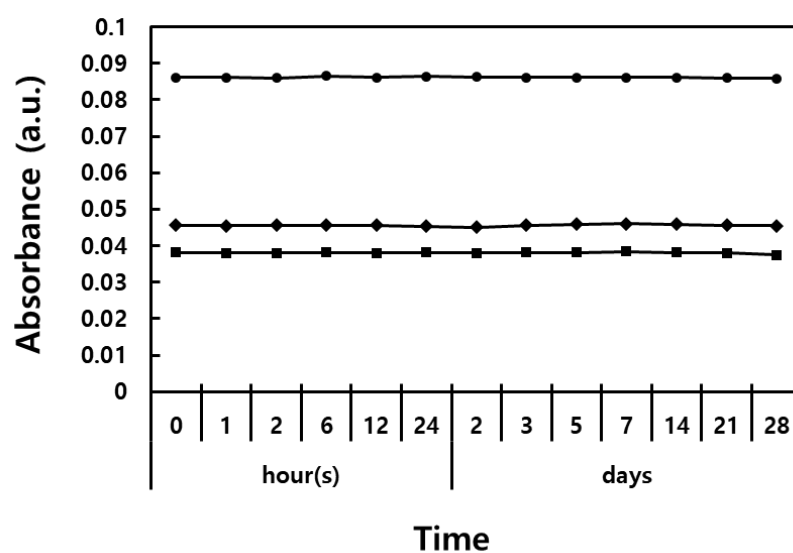

**Figure S6.** Stability of the  $\text{As}^{3+}$ /N-Tyr reaction was checked. Three different  $\text{As}^{3+}$  concentrations, e.g., 0.1 (square), 1 (diamond), and 10  $\mu\text{M}$  (circle), were reacted with 0.5 mM N-Tyr then, stayed at RT condition for 28 days. Almost same absorbance degrees were obtained from each measurement.
